# Supplementary material for: Tup1 is critical for transcriptional repression in Quiescence in S. cerevisiae
Source: PubMed Central journal article supplement (PMC9815585; doi:10.1371/journal.pgen.1010559), 2022-12-21
Supplement: pgen.1010559.s003.pdf [file pgen.1010559.s003.pdf]

| ALT_ID     | CONSENSUS             | TP  | TP%   | FP | FP%   | ENR_RATIO | SCORE_THR | PVALUE    | LOG_PVALUE | EVALUE    | LOG_EVALUE | QVALUE    | LOG_QVALUE |
|------------|-----------------------|-----|-------|----|-------|-----------|-----------|-----------|------------|-----------|------------|-----------|------------|
| Urc2p      | HCGGAGWTA             | 57  | 29.23 | 12 | 6.15  | 4.46      | 13        | 3.330E-08 | -17.22     | 0.0000243 | -10.62     | 0.0000134 | -11.22     |
| Rap1p      | ACACCAYACAYYY         | 64  | 32.82 | 16 | 8.21  | 3.82      | 12        | 5.430E-08 | -16.73     | 0.0000398 | -10.13     | 0.0000134 | -11.22     |
| Tod6p      | ADCGCGATGAGSTNHNV     | 28  | 14.36 | 1  | 0.51  | 14.5      | 13        | 7.890E-08 | -16.36     | 0.0000577 | -9.76      | 0.0000134 | -11.22     |
| Dot6p      | ANGANGCGATGAGSTGH     | 24  | 12.31 | 0  | 0     | 25        | 16        | 8.090E-08 | -16.33     | 0.0000592 | -9.73      | 0.0000134 | -11.22     |
| Mot3p      | TAGGTA                | 65  | 33.33 | 18 | 9.23  | 3.47      | 12        | 1.920E-07 | -15.47     | 0.000141  | -8.87      | 0.0000254 | -10.58     |
| Urc2p      | CNTCGGAGATAWTT        | 57  | 29.23 | 15 | 7.69  | 3.63      | 12        | 5.610E-07 | -14.39     | 0.000411  | -7.8       | 0.0000619 | -9.69      |
| Met32p     | ANTGTGGCGB            | 53  | 27.18 | 14 | 7.18  | 3.6       | 11        | 1.460E-06 | -13.44     | 0.00107   | -6.84      | 0.000138  | -8.89      |
| Rox1p      | TCTATTGTTCC           | 54  | 27.69 | 15 | 7.69  | 3.44      | 8.8       | 2.160E-06 | -13.05     | 0.00158   | -6.45      | 0.000179  | -8.63      |
| Ste12p     | TTGAAACAATGAAACG      | 50  | 25.64 | 13 | 6.67  | 3.64      | 8.4       | 2.430E-06 | -12.93     | 0.00178   | -6.33      | 0.000179  | -8.63      |
| Stp4p      | DNNNNTTCAGCCGYACBAGNG | 70  | 35.9  | 25 | 12.82 | 2.73      | 11        | 3.830E-06 | -12.47     | 0.0028    | -5.88      | 0.000253  | -8.28      |
| Tec1p      | ACATTCTTACATTCTT      | 64  | 32.82 | 22 | 11.28 | 2.83      | 7.5       | 5.630E-06 | -12.09     | 0.00412   | -5.49      | 0.000339  | -7.99      |
| Azf1p      | AAAAAGAAA             | 60  | 30.77 | 20 | 10.26 | 2.9       | 12        | 7.180E-06 | -11.84     | 0.00526   | -5.25      | 0.000396  | -7.83      |
| Matalpha2p | ATTGTT                | 76  | 38.97 | 30 | 15.38 | 2.48      | 8.9       | 8.230E-06 | -11.71     | 0.00603   | -5.11      | 0.000419  | -7.78      |
| YGR067C    | GHGGGG                | 75  | 38.46 | 30 | 15.38 | 2.45      | 9.6       | 1.170E-05 | -11.35     | 0.0086    | -4.76      | 0.000556  | -7.5       |
| Upc2p      | CTCGTWTAG             | 83  | 42.56 | 36 | 18.46 | 2.27      | 11        | 1.800E-05 | -10.92     | 0.0132    | -4.33      | 0.000795  | -7.14      |
| Srd1p      | CNNTTGTAGATCYCAH      | 72  | 36.92 | 29 | 14.87 | 2.43      | 10        | 1.960E-05 | -10.84     | 0.0143    | -4.25      | 0.000809  | -7.12      |
| Mot3p      | WAGGTA                | 67  | 34.36 | 26 | 13.33 | 2.52      | 11        | 2.140E-05 | -10.75     | 0.0157    | -4.15      | 0.000835  | -7.09      |
| Pdr1p      | TCCGCGGA              | 48  | 24.62 | 15 | 7.69  | 3.06      | 11        | 2.880E-05 | -10.46     | 0.0211    | -3.86      | 0.000953  | -6.96      |
| Pdr3p      | TCCGCGGA              | 48  | 24.62 | 15 | 7.69  | 3.06      | 11        | 2.880E-05 | -10.46     | 0.0211    | -3.86      | 0.000953  | -6.96      |
| Rap1p      | GGRTGTACGG            | 48  | 24.62 | 15 | 7.69  | 3.06      | 10        | 2.880E-05 | -10.46     | 0.0211    | -3.86      | 0.000953  | -6.96      |
| Ste12p     | ATGAAACAATGAGACA      | 26  | 13.33 | 4  | 2.05  | 5.4       | 14        | 3.950E-05 | -10.14     | 0.0289    | -3.54      | 0.00115   | -6.77      |
| Msn1p      | AATGTCC               | 54  | 27.69 | 19 | 9.74  | 2.75      | 12        | 3.980E-05 | -10.13     | 0.0291    | -3.54      | 0.00115   | -6.77      |
| YKL222C    | BAACGGARATAANNC       | 54  | 27.69 | 19 | 9.74  | 2.75      | 12        | 3.980E-05 | -10.13     | 0.0291    | -3.54      | 0.00115   | -6.77      |
| Tec1p      | TTCTCACATTCTTC        | 71  | 36.41 | 30 | 15.38 | 2.32      | 9.1       | 4.720E-05 | -9.96      | 0.0345    | -3.37      | 0.00129   | -6.65      |
| Zap1p      | TTCTTATGGT            | 45  | 23.08 | 14 | 7.18  | 3.07      | 14        | 4.880E-05 | -9.93      | 0.0357    | -3.33      | 0.00129   | -6.65      |
| Hap1p      | TAWCTCCG              | 55  | 28.21 | 20 | 10.26 | 2.67      | 12        | 5.110E-05 | -9.88      | 0.0374    | -3.29      | 0.0013    | -6.64      |
| Gat3p      | AAATBRGATCTACAAGCTG   | 81  | 41.54 | 38 | 19.49 | 2.1       | 9.8       | 8.830E-05 | -9.34      | 0.0646    | -2.74      | 0.00216   | -6.14      |
| Tye7p      | TGCRTCACGTGAYGCNNC    | 22  | 11.28 | 3  | 1.54  | 5.75      | 13        | 1.000E-04 | -9.21      | 0.0732    | -2.61      | 0.00236   | -6.05      |
| YML081W    | CCCCDCH               | 107 | 54.87 | 57 | 29.23 | 1.86      | 10        | 1.110E-04 | -9.1       | 0.0816    | -2.51      | 0.00254   | -5.97      |
| Ste12p     | CGTTTCA               | 68  | 34.87 | 30 | 15.38 | 2.23      | 13        | 1.280E-04 | -8.96      | 0.0937    | -2.37      | 0.00282   | -5.87      |
| Yrm1p      | ACGGAAAT              | 66  | 33.85 | 29 | 14.87 | 2.23      | 12        | 1.510E-04 | -8.8       | 0.11      | -2.2       | 0.00322   | -5.74      |
| Yox1p      | TWAATTR               | 29  | 14.87 | 7  | 3.59  | 3.75      | 7.4       | 2.080E-04 | -8.48      | 0.152     | -1.88      | 0.00423   | -5.47      |
| Arg81p     | AAGTGCAACTGACTGCCA    | 25  | 12.82 | 5  | 2.56  | 4.33      | 7.6       | 2.110E-04 | -8.47      | 0.154     | -1.87      | 0.00423   | -5.47      |
| Sfl1p      | THNHDNATAGAAGAAATAWDW | 32  | 16.41 | 9  | 4.62  | 3.3       | 13        | 2.910E-04 | -8.14      | 0.213     | -1.55      | 0.00567   | -5.17      |
| Stp4p      | TGCGCTABC             | 72  | 36.92 | 35 | 17.95 | 2.03      | 11        | 3.620E-04 | -7.93      | 0.265     | -1.33      | 0.00684   | -4.99      |
| Hcm1p      | ATMAACAA              | 63  | 32.31 | 29 | 14.87 | 2.13      | 10        | 3.970E-04 | -7.83      | 0.291     | -1.24      | 0.00731   | -4.92      |
| Stp3p      | GCTAGCGCA             | 55  | 28.21 | 24 | 12.31 | 2.24      | 12        | 4.800E-04 | -7.64      | 0.351     | -1.05      | 0.00859   | -4.76      |
| Lys14p     | CNCAAAATCCBGCGNT      | 47  | 24.1  | 19 | 9.74  | 2.4       | 12        | 5.470E-04 | -7.51      | 0.4       | -0.92      | 0.00953   | -4.65      |
| Abf1p      | RTCRIYY               | 51  | 26.15 | 22 | 11.28 | 2.26      | 10        | 6.690E-04 | -7.31      | 0.49      | -0.71      | 0.0114    | -4.48      |
| Fzf1p      | YGSMMMCTATCAYTTY      | 40  | 20.51 | 15 | 7.69  | 2.56      | 11        | 7.060E-04 | -7.26      | 0.517     | -0.66      | 0.0117    | -4.45      |
| Pdr8p      | TCCGHGGA              | 88  | 45.13 | 49 | 25.13 | 1.78      | 9.2       | 9.120E-04 | -7         | 0.668     | -0.4       | 0.0147    | -4.22      |
| Rds2p      | ANNNNGAAAYCCGAGNNNT   | 55  | 28.21 | 26 | 13.33 | 2.07      | 11        | 1.240E-03 | -6.69      | 0.909     | -0.1       | 0.0196    | -3.93      |
| Gsm1p      | ANCTCCG               | 65  | 33.33 | 34 | 17.44 | 1.89      | 9.5       | 1.810E-03 | -6.32      | 1.32      | 0.28       | 0.0262    | -3.64      |
| Mig1p      | ATTTTGCGGGG           | 58  | 29.74 | 29 | 14.87 | 1.97      | 10        | 1.820E-03 | -6.31      | 1.33      | 0.29       | 0.0262    | -3.64      |

|         |                          |     |       |     |       |      |      |           |       |      |      |        |       |
|---------|--------------------------|-----|-------|-----|-------|------|------|-----------|-------|------|------|--------|-------|
| Mig2p   | ATTTTGC GGGG             | 58  | 29.74 | 29  | 14.87 | 1.97 | 10   | 1.820E-03 | -6.31 | 1.33 | 0.29 | 0.0262 | -3.64 |
| Mig3p   | ATTTTGC GGGG             | 58  | 29.74 | 29  | 14.87 | 1.97 | 10   | 1.820E-03 | -6.31 | 1.33 | 0.29 | 0.0262 | -3.64 |
| Gcr1p   | CWTCC                    | 52  | 26.67 | 25  | 12.82 | 2.04 | 9    | 2.000E-03 | -6.21 | 1.46 | 0.38 | 0.0282 | -3.57 |
| Cep3p   | YTCGAAA                  | 78  | 40    | 44  | 22.56 | 1.76 | 12   | 2.090E-03 | -6.17 | 1.53 | 0.43 | 0.0288 | -3.55 |
| Cup2p   | HTHNNGCTGD               | 27  | 13.85 | 9   | 4.62  | 2.8  | 12   | 2.490E-03 | -5.99 | 1.83 | 0.6  | 0.0337 | -3.39 |
| Stb5p   | CGGTGTTA                 | 30  | 15.38 | 11  | 5.64  | 2.58 | 10   | 2.780E-03 | -5.89 | 2.03 | 0.71 | 0.0368 | -3.3  |
| Rlm1p   | CTAWWWWTAG               | 39  | 20    | 17  | 8.72  | 2.22 | 10   | 3.060E-03 | -5.79 | 2.24 | 0.81 | 0.0397 | -3.23 |
| Tbf1p   | ARCCCTAA                 | 64  | 32.82 | 35  | 17.95 | 1.81 | 11   | 3.420E-03 | -5.68 | 2.5  | 0.92 | 0.0435 | -3.13 |
| YKL222C | AACGGARAT                | 73  | 37.44 | 42  | 21.54 | 1.72 | 11   | 3.730E-03 | -5.59 | 2.73 | 1.01 | 0.0466 | -3.07 |
| Arg80p  | CCTCTAAAGG               | 51  | 26.15 | 26  | 13.33 | 1.93 | 9.2  | 4.100E-03 | -5.5  | 3    | 1.1  | 0.0503 | -2.99 |
| Srd1p   | GTAGWTC                  | 42  | 21.54 | 20  | 10.26 | 2.05 | 9.6  | 4.800E-03 | -5.34 | 3.51 | 1.26 | 0.0578 | -2.85 |
| Mcm1p   | TTACNAATTNGGTAA          | 110 | 56.41 | 72  | 36.92 | 1.52 | 4    | 4.960E-03 | -5.31 | 3.63 | 1.29 | 0.0578 | -2.85 |
| Ixr1p   | KTTSAAYKTTYASA           | 105 | 53.85 | 68  | 34.87 | 1.54 | 6.6  | 4.970E-03 | -5.3  | 3.64 | 1.29 | 0.0578 | -2.85 |
| Abf1p   | AGCCGTAAATAGTTATCTTCCAAG | 33  | 16.92 | 14  | 7.18  | 2.27 | 0.15 | 5.130E-03 | -5.27 | 3.76 | 1.32 | 0.0586 | -2.84 |
| Aft2p   | CGCACCC                  | 101 | 51.79 | 66  | 33.85 | 1.52 | 9.4  | 6.670E-03 | -5.01 | 4.88 | 1.59 | 0.0749 | -2.59 |
| Yap1p   | ASGTAATT                 | 108 | 55.38 | 72  | 36.92 | 1.49 | 10   | 7.240E-03 | -4.93 | 5.3  | 1.67 | 0.0799 | -2.53 |
| Nrg2p   | HAGGGTCB                 | 50  | 25.64 | 27  | 13.85 | 1.82 | 11   | 7.970E-03 | -4.83 | 5.83 | 1.76 | 0.0865 | -2.45 |
| Cad1p   | TTACGTAAT                | 152 | 77.95 | 109 | 55.9  | 1.39 | 7.5  | 8.230E-03 | -4.8  | 6.02 | 1.8  | 0.0879 | -2.43 |
| Pdr3p   | VCGGAA                   | 47  | 24.1  | 25  | 12.82 | 1.85 | 8.8  | 8.600E-03 | -4.76 | 6.3  | 1.84 | 0.0894 | -2.41 |
| Dal81p  | GAAAATTGCGTT             | 55  | 28.21 | 31  | 15.9  | 1.75 | 10   | 8.780E-03 | -4.74 | 6.43 | 1.86 | 0.0894 | -2.41 |
| Dal82p  | GAAAATTGCGTT             | 55  | 28.21 | 31  | 15.9  | 1.75 | 10   | 8.780E-03 | -4.74 | 6.43 | 1.86 | 0.0894 | -2.41 |
| Met32p  | TGTGGCDB                 | 132 | 67.69 | 93  | 47.69 | 1.41 | 8.9  | 9.450E-03 | -4.66 | 6.92 | 1.93 | 0.0948 | -2.36 |
| Rds1p   | CCBBTCGGCCGA AVDNCD      | 89  | 45.64 | 58  | 29.74 | 1.53 | 7.2  | 1.000E-02 | -4.61 | 7.32 | 1.99 | 0.0988 | -2.31 |
| Rlm1p   | TAWWWWTAGM               | 81  | 41.54 | 52  | 26.67 | 1.55 | 9.2  | 1.110E-02 | -4.51 | 8.09 | 2.09 | 0.103  | -2.27 |
| Met32p  | ABTGTGGC                 | 67  | 34.36 | 41  | 21.03 | 1.62 | 10   | 1.120E-02 | -4.49 | 8.22 | 2.11 | 0.103  | -2.27 |
| Mig1p   | TTATTCTGGGG              | 108 | 55.38 | 74  | 37.95 | 1.45 | 6.4  | 1.130E-02 | -4.48 | 8.28 | 2.11 | 0.103  | -2.27 |
| Mig2p   | TTATTCTGGGG              | 108 | 55.38 | 74  | 37.95 | 1.45 | 6.4  | 1.130E-02 | -4.48 | 8.28 | 2.11 | 0.103  | -2.27 |
| Mig3p   | TTATTCTGGGG              | 108 | 55.38 | 74  | 37.95 | 1.45 | 6.4  | 1.130E-02 | -4.48 | 8.28 | 2.11 | 0.103  | -2.27 |
| Mot3p   | AAGGWT                   | 50  | 25.64 | 28  | 14.36 | 1.76 | 11   | 1.140E-02 | -4.48 | 8.32 | 2.12 | 0.103  | -2.27 |
| Msn1p   | AATGTCC                  | 39  | 20    | 20  | 10.26 | 1.9  | 12   | 1.190E-02 | -4.43 | 8.69 | 2.16 | 0.106  | -2.24 |
| Stb5p   | CGGKTTATA                | 73  | 37.44 | 46  | 23.59 | 1.57 | 9.9  | 1.210E-02 | -4.41 | 8.89 | 2.19 | 0.107  | -2.23 |
| Rdr1p   | TNNGNCNTGCGGAWATNNNNC    | 60  | 30.77 | 36  | 18.46 | 1.65 | 12   | 1.280E-02 | -4.36 | 9.39 | 2.24 | 0.111  | -2.2  |
| Rph1p   | AANNDAWTTAGGGGK GNA      | 84  | 43.08 | 55  | 28.21 | 1.52 | 9.5  | 1.290E-02 | -4.35 | 9.41 | 2.24 | 0.111  | -2.2  |

### Supplementary Table 1: Motif Analysis of Tup1 ChIP in Stationary Phase (3 day)

TP = The number of **primary** sequences matching the motif / the number of primary sequences (the percentage of primary sequences matching the motif)

TP% = The percentage of primary sequences matching the motif with scores greater than or equal to the optimal match score threshold

FP = The number of **control** sequences matching the motif / the number of primary sequences (the percentage of control sequences matching the motif)

FP% = The percentage of control sequences matching the motif with scores greater than or equal to the optimal match score threshold

ENR\_RATIO = The relative enrichment ration of the motif in the primary vs. control sequences, defined as

$$\text{Ratio} = ((TP+1)/(NPOS+1)) / ((FP+1)/(NNEG+1)),$$

where NPOS is the number of primary sequences in the input, and NNEG is the number of control sequences in the input

SCORE\_THR = The match score threshold giving the optimal *p*-value. This is the score threshold used by SEA to determine the values of "TP" and "FP"
